# Supplementary material
Source: Springer Nature journal article supplement (https://www.springermedizin.de/resource/supplementary/12916_2012_589_MOESM9_ESM.pdf/9598210)

## Treatment Outcomes by Region for a Subgroup of Outcome Groups

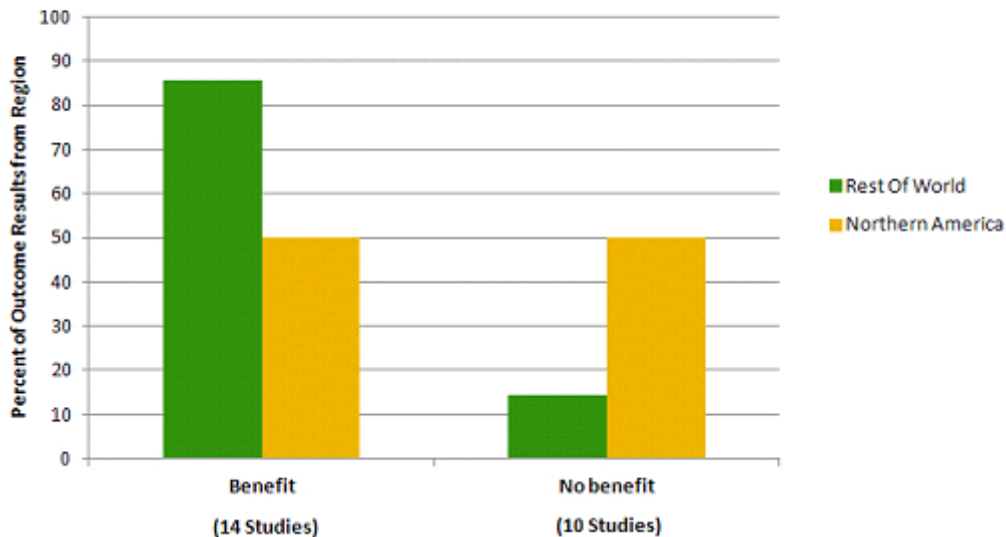

Supplement: MOESM9 [file 9598210]
